# Supplementary material for: DNA methylome and transcriptome analysis established a model of four differentially methylated positions (DMPs) as a diagnostic marker in esophageal adenocarcinoma early detection
Source: PeerJ journal article supplement (doi:10.7717/peerj.11355), 2021-05-07

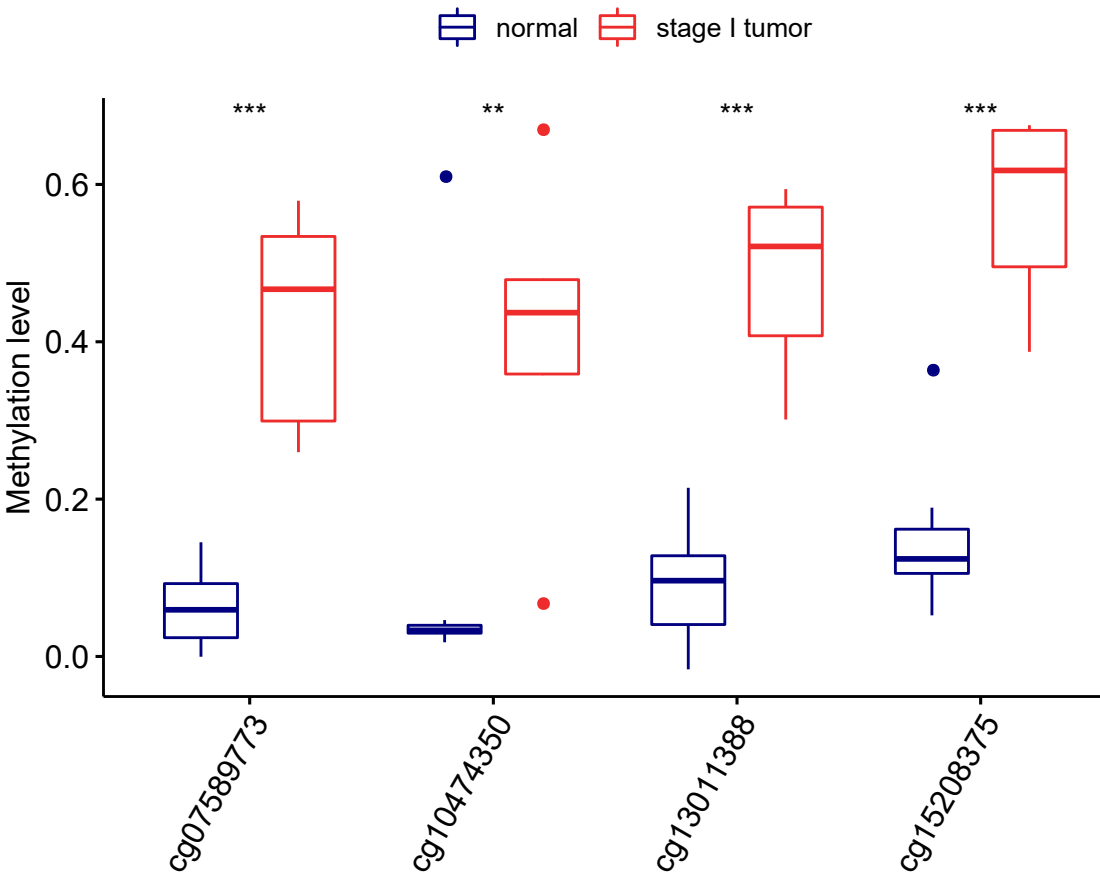

Supplement: supplement_figure5.pdf [file supplement_figure5.pdf]
